# Supplementary material for: Peniciadametizine A, a Dithiodiketopiperazine with a Unique Spiro[furan-2,7'-pyrazino[1,2-b][1,2]oxazine] Skeleton, and a Related Analogue, Peniciadametizine B, from the Marine Sponge-Derived Fungus Penicillium adametzioides
Source: PubMed Central journal article supplement (PMC4483649; doi:10.3390/md13063640), 2015-06-05
Supplement: marinedrugs-13-03640-s001.pdf [file marinedrugs-13-03640-s001.pdf]

# Supplementary Information

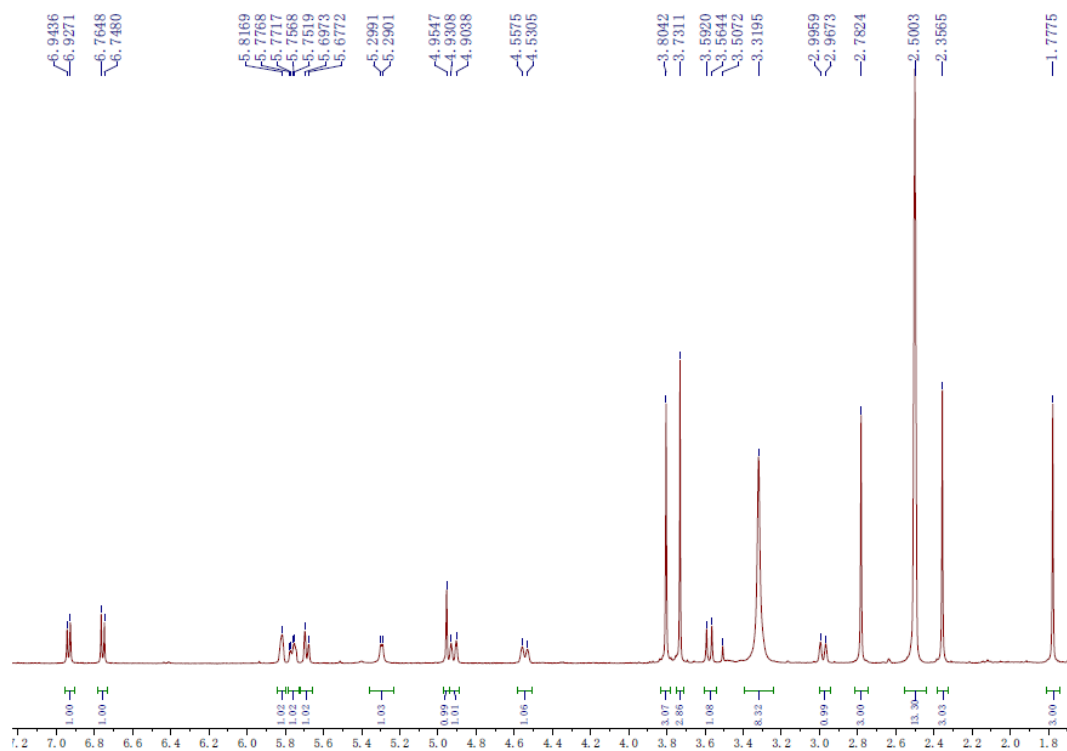

Figure S1.  $^1\text{H}$  NMR (500 MHz,  $\text{DMSO-}d_6$ ) spectrum of compound **1**.

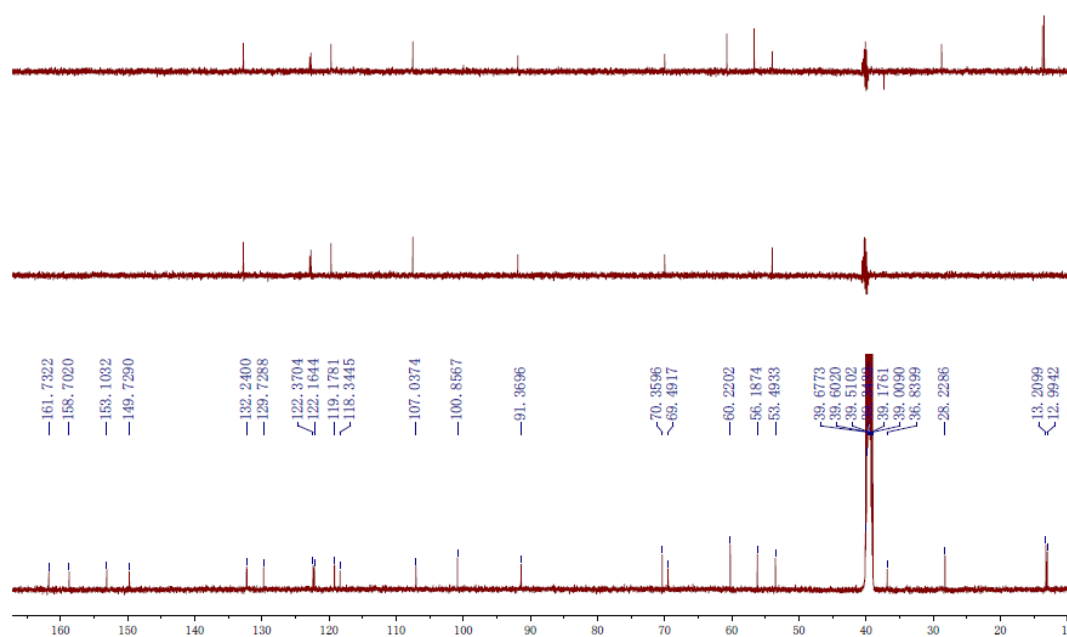

Figure S2.  $^{13}\text{C}$  NMR (125 MHz,  $\text{DMSO-}d_6$ ) and DEPT spectra of compound **1**.

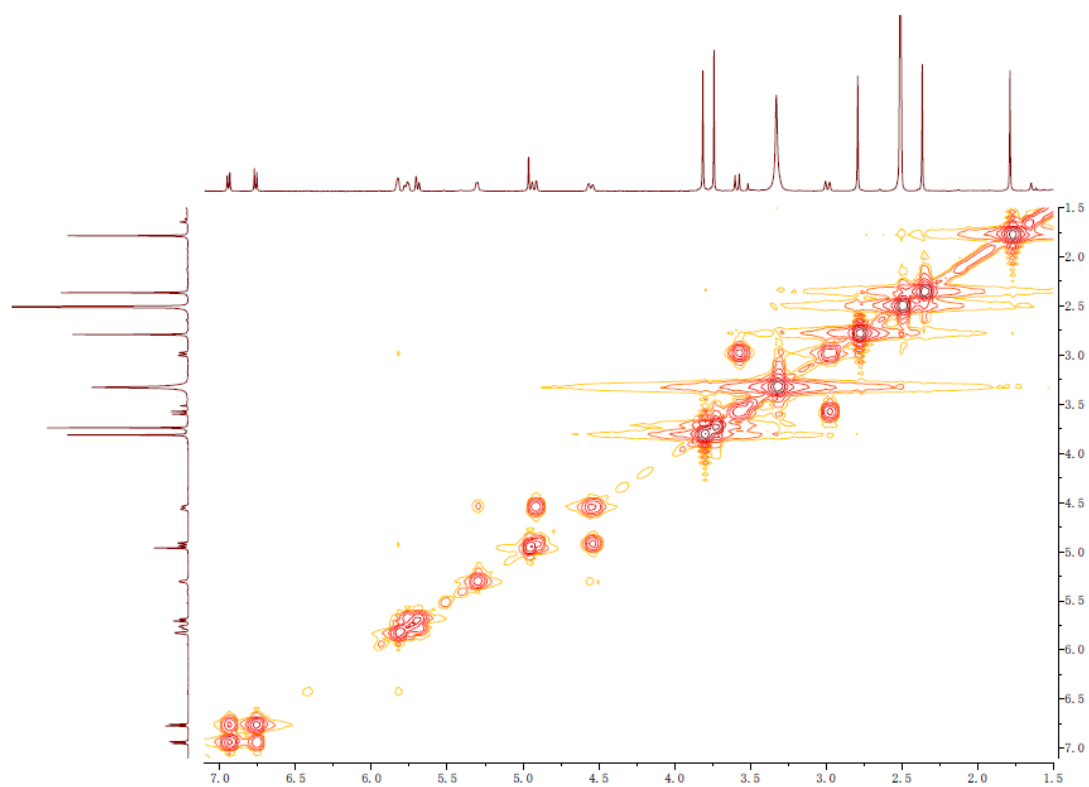

Figure S3. COSY spectrum of compound 1.

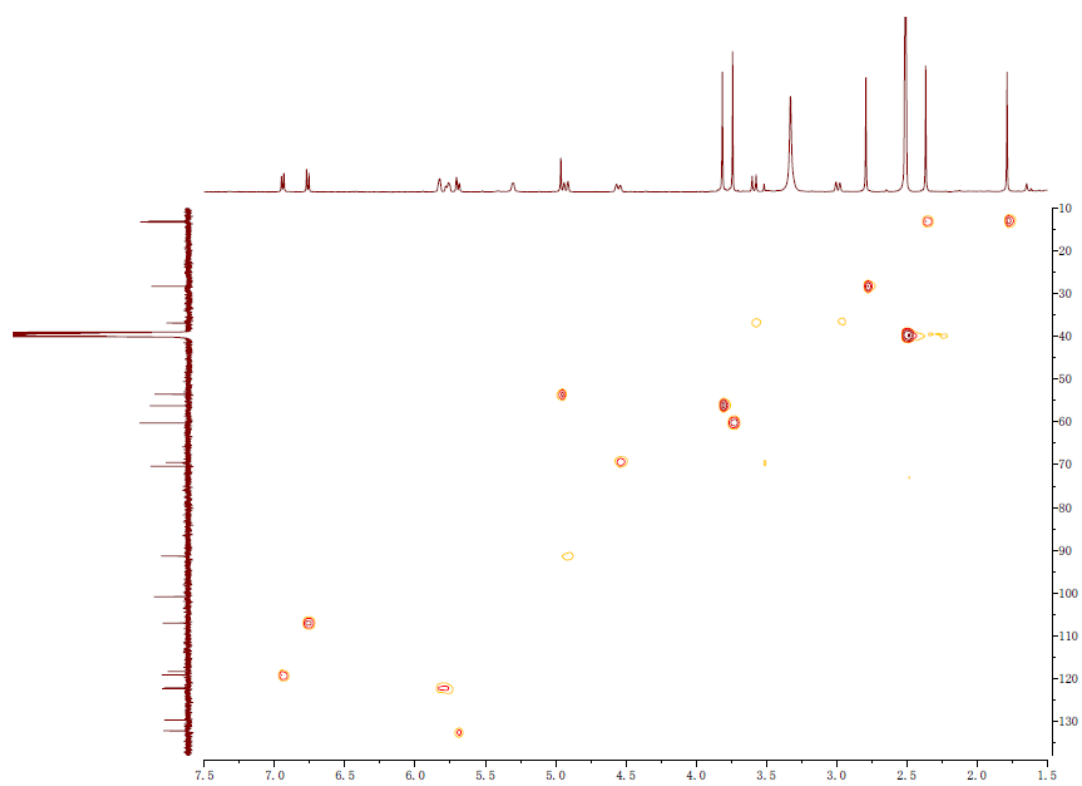

Figure S4. HSQC spectrum of compound 1.

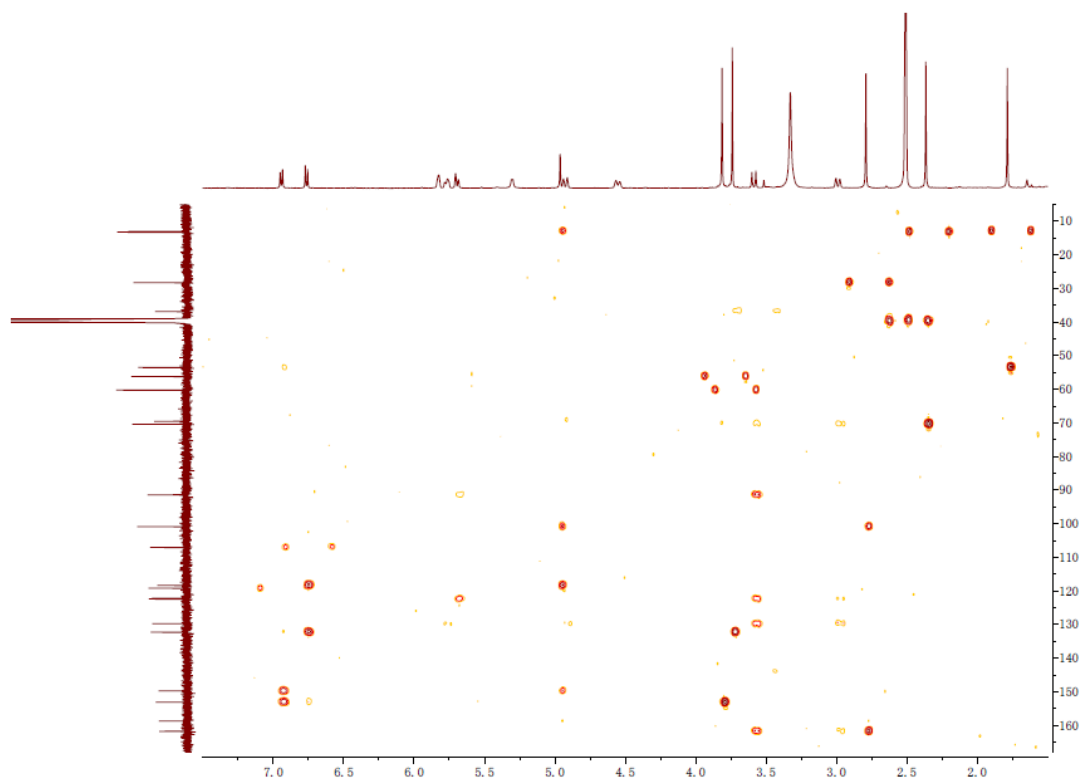

Figure S5. HMBC spectrum of compound 1.

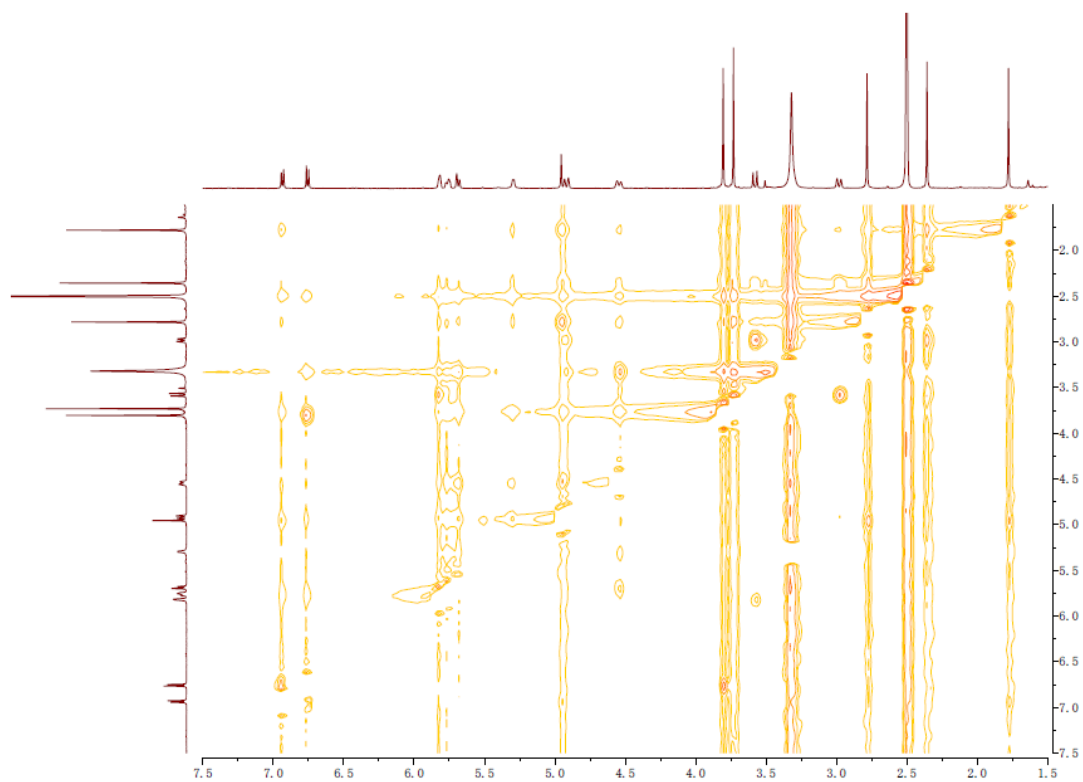

Figure S6. TOF-ESI-MS spectrum of compound 1.

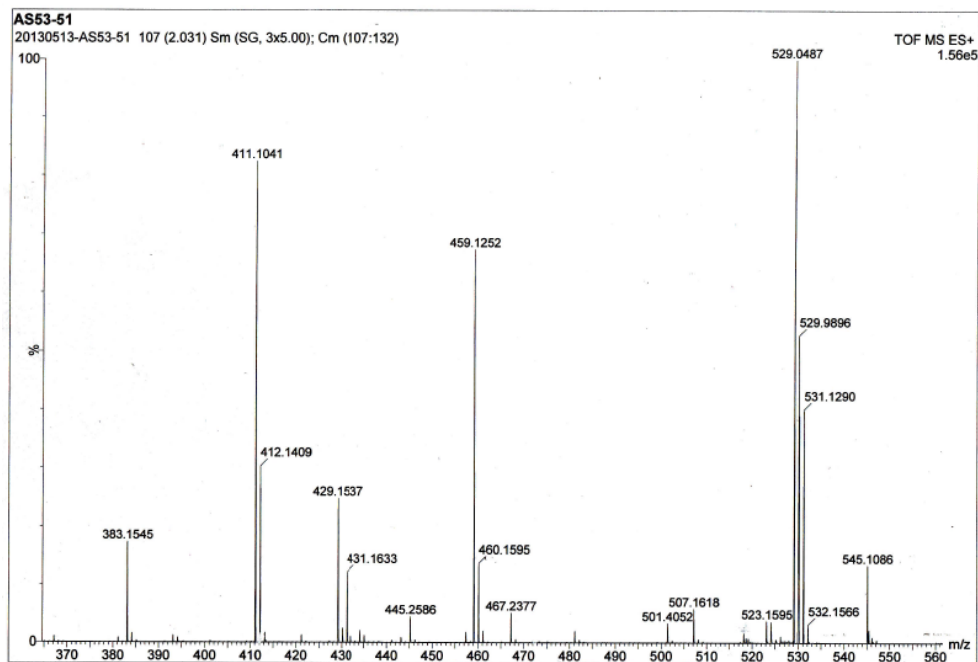

Figure S7. NOESY spectrum of compound 1.

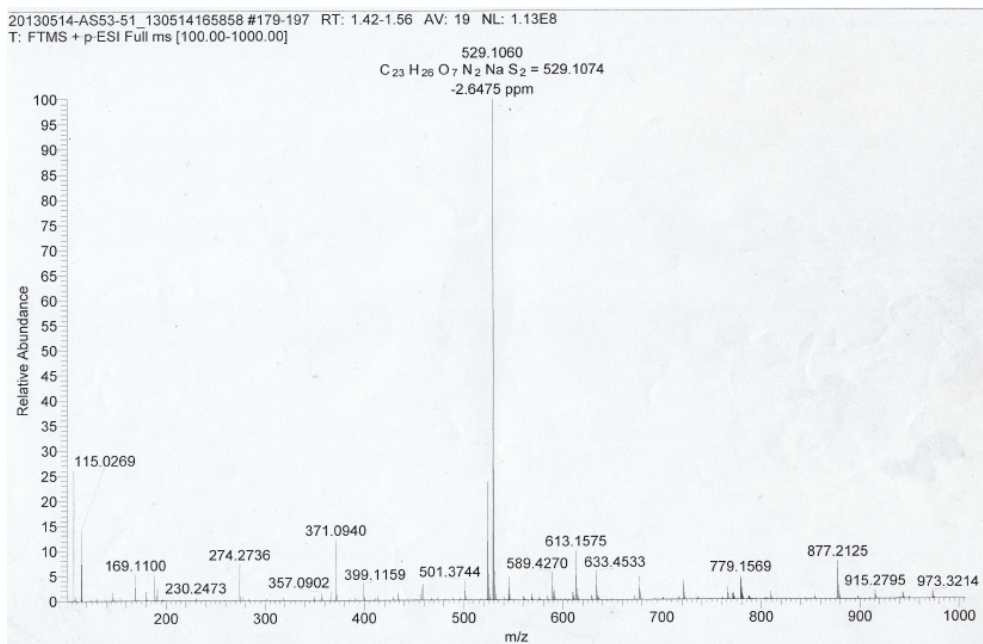

Figure S8. HR-ESI-MS spectrum of compound 1.

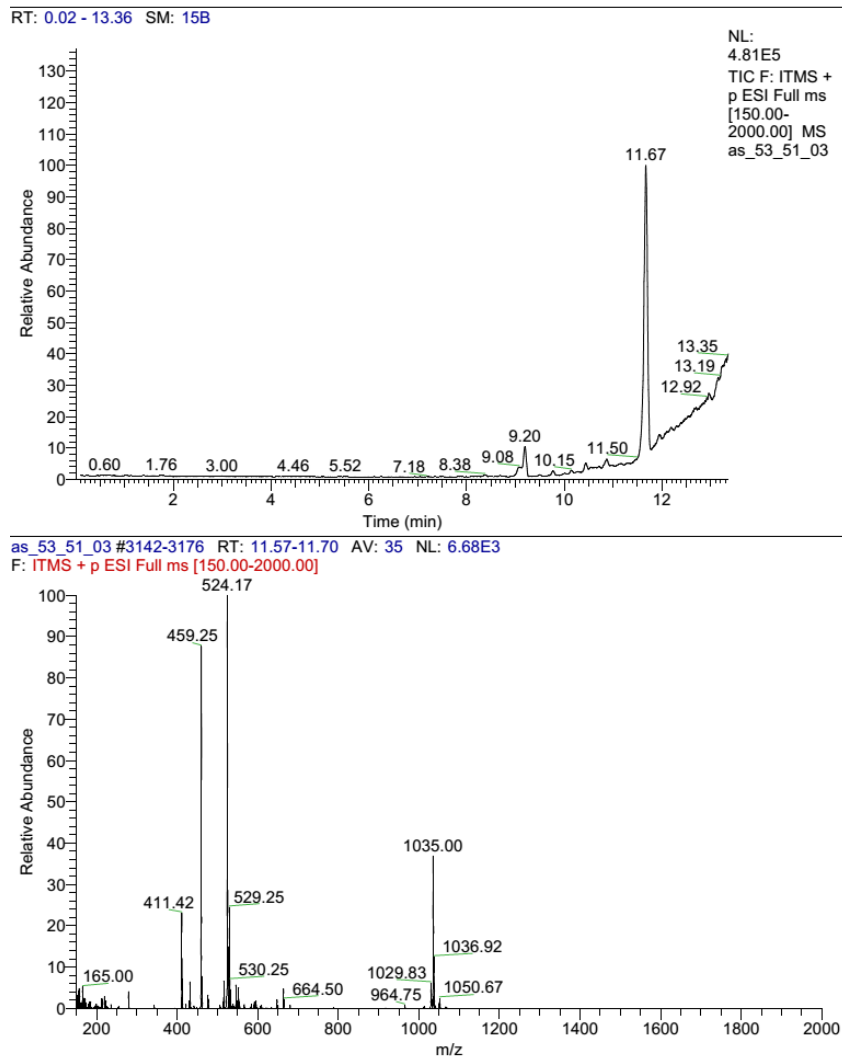

**Figure S9.** HPLC-UV chromatogram and HPLC-MS trace of **1**. Base peak (524.17):  $[M + H_2O]^+$ , 529:  $[M + Na]^+$ , 1035:  $[2M + Na]^+$ .

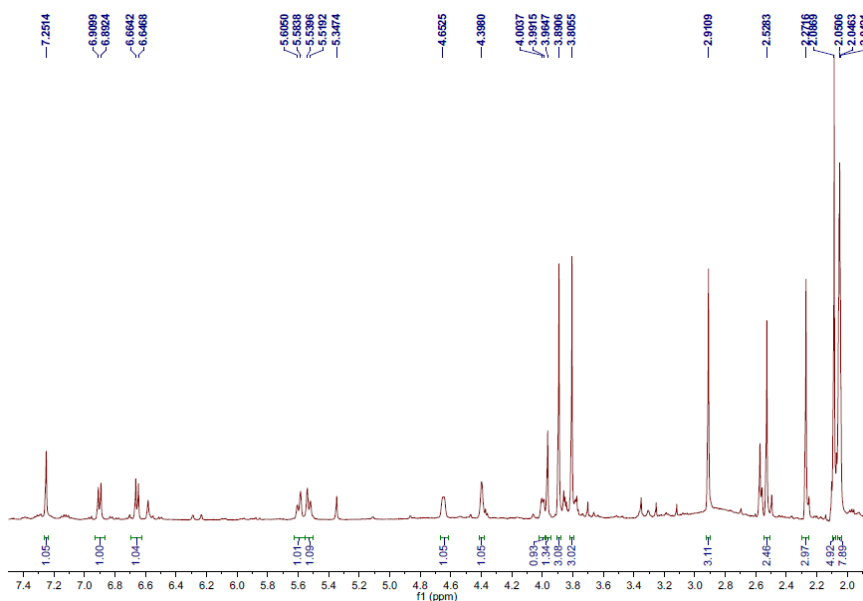

**Figure S10.**  $^1H$  NMR (500 MHz, acetone- $d_6$ ) spectrum of compound **2**.

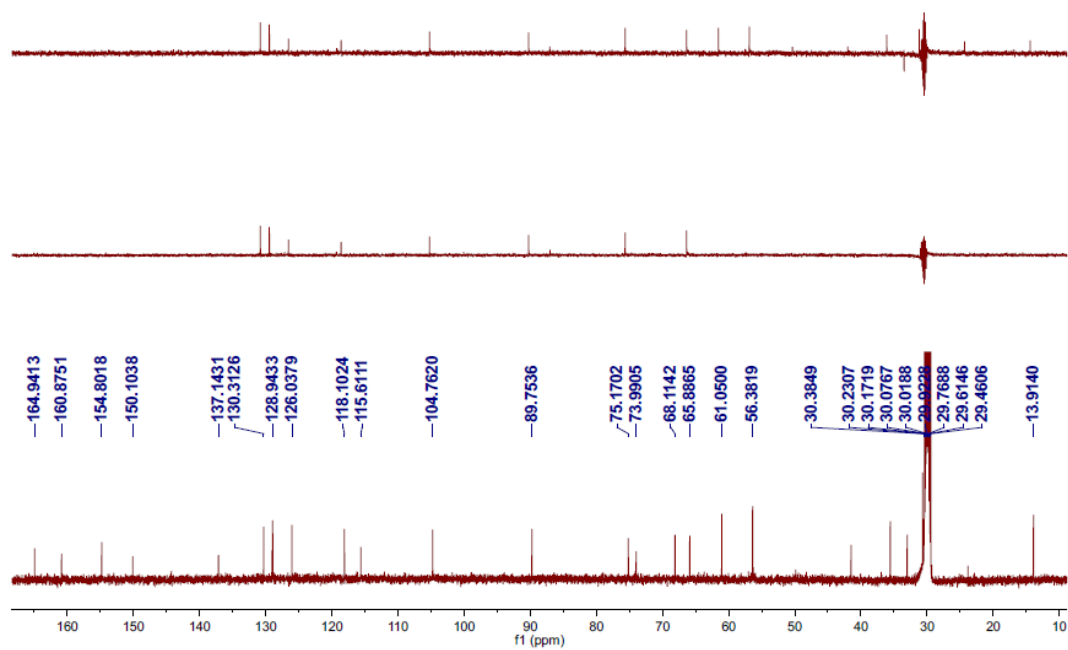

Figure S11.  $^{13}\text{C}$  NMR (125 MHz, acetone- $d_6$ ) and DEPT spectra of compound 2.

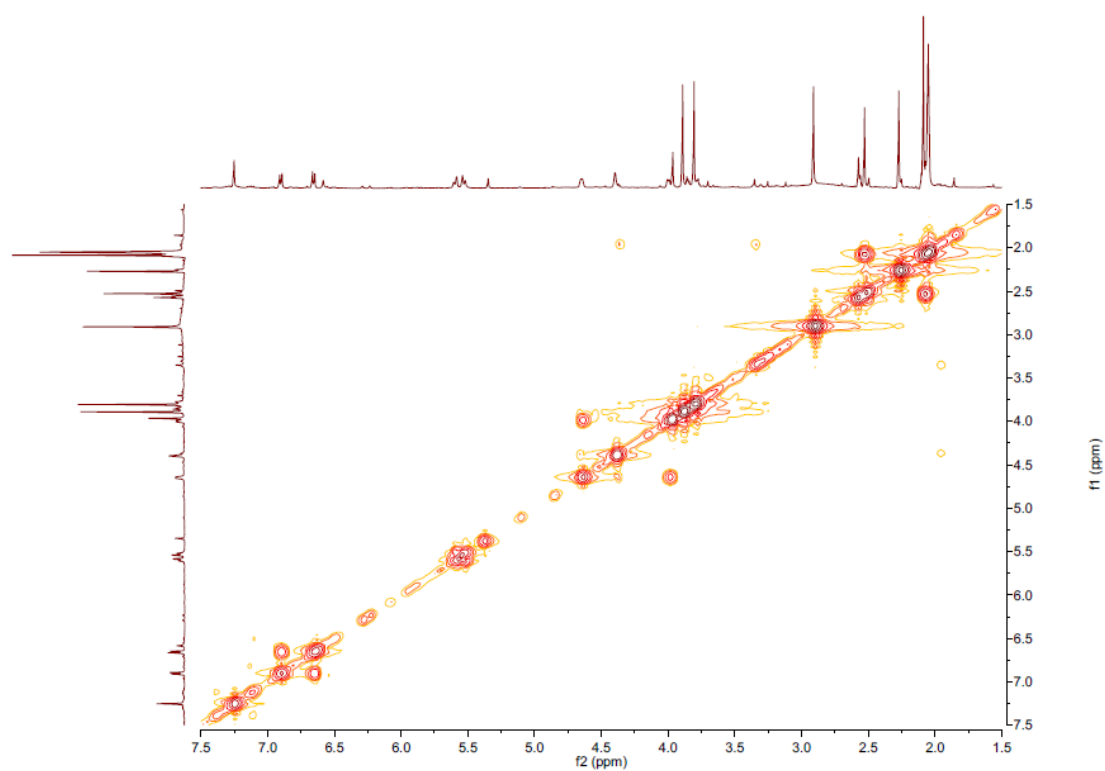

Figure S12. COSY spectrum of compound 2.

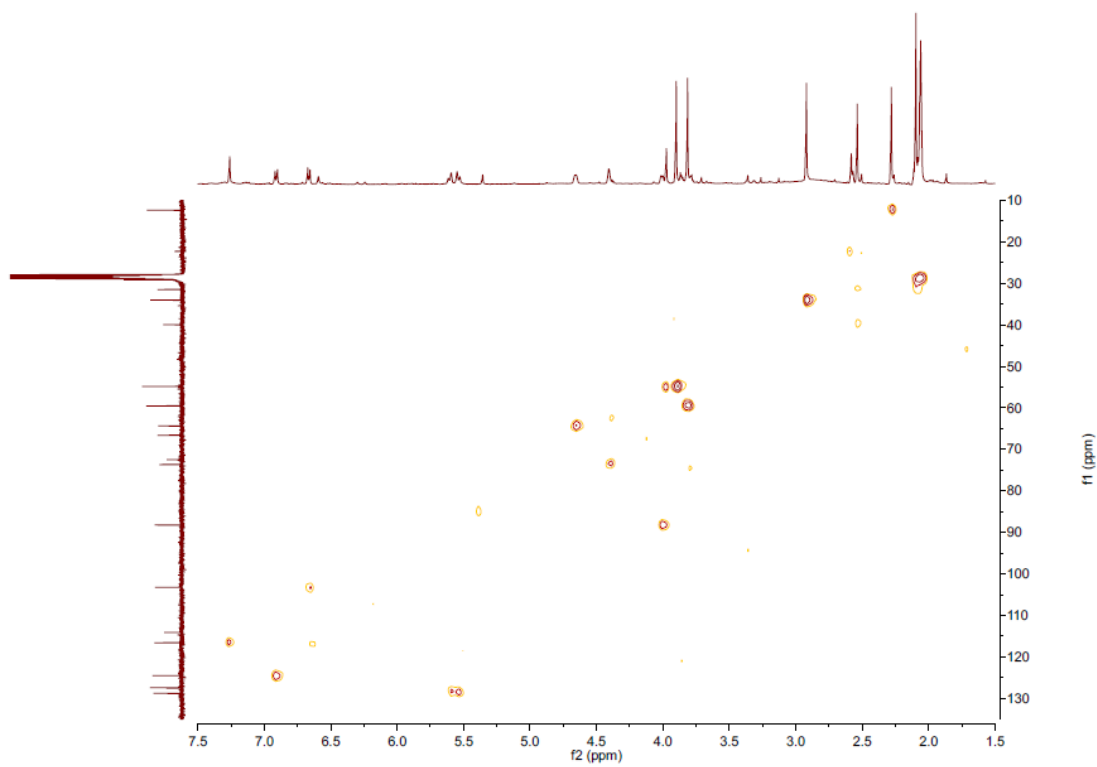

**Figure S13.** HSQC spectrum of compound 2.

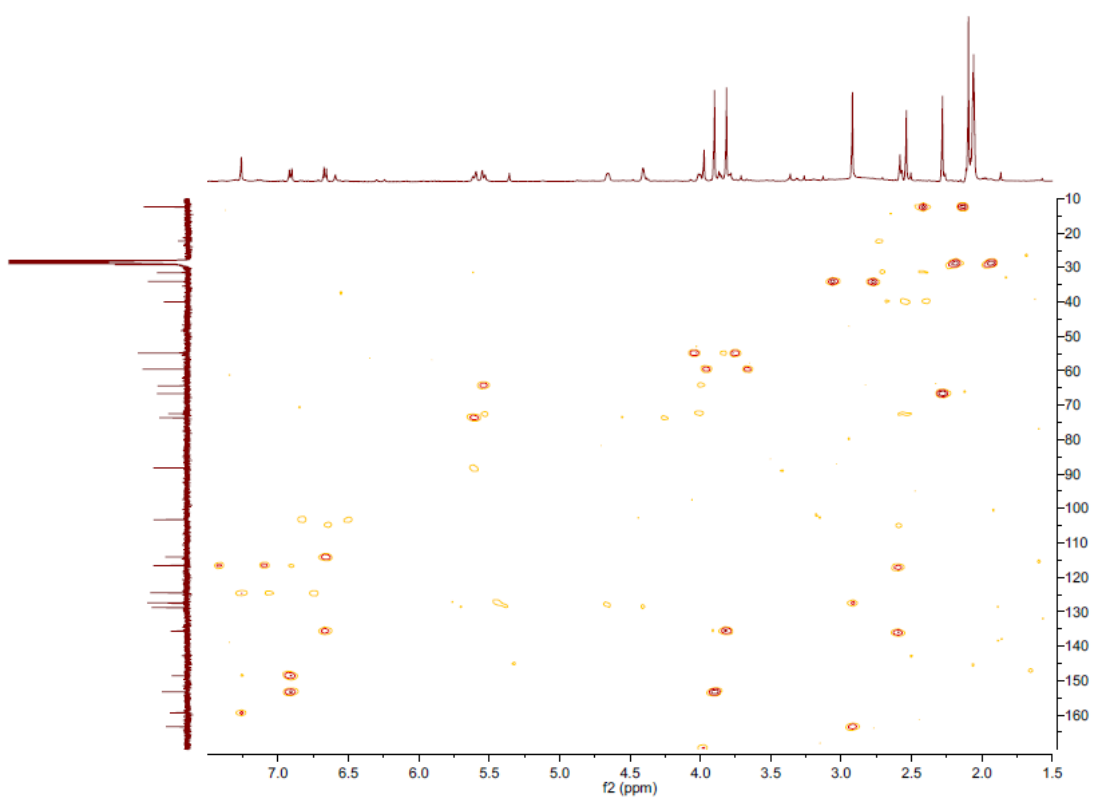

**Figure S14.** HMBC spectrum of compound 2.

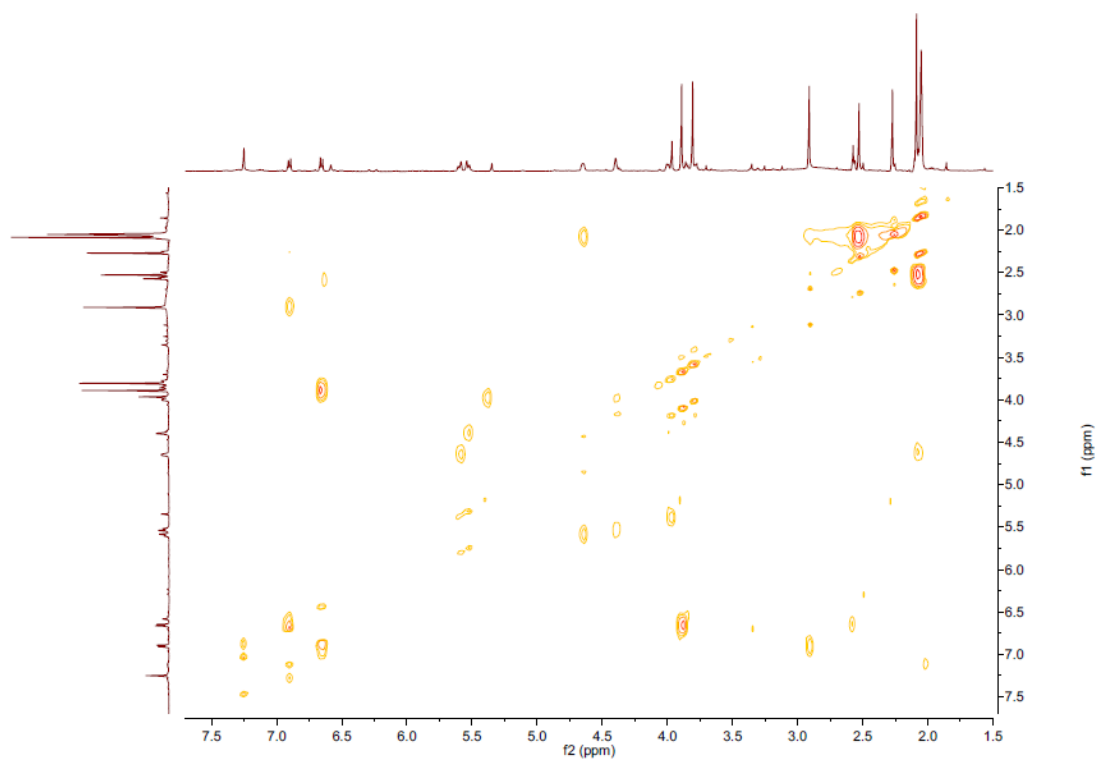

**Figure S15.** NOESY spectrum of compound 2.

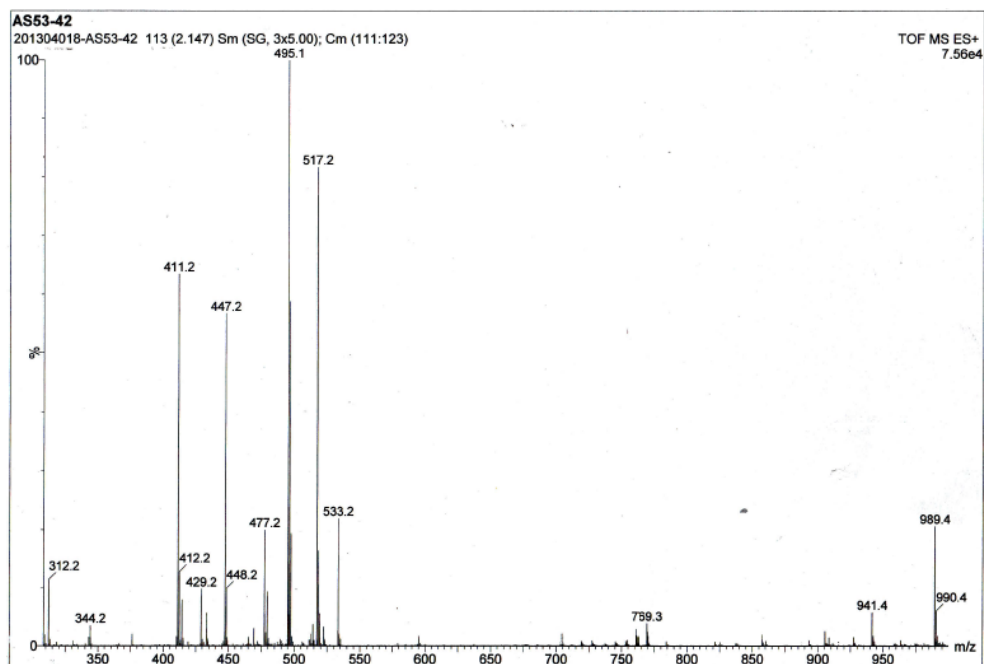

**Figure S16.** TOF-ESI-MS spectrum of compound 2.



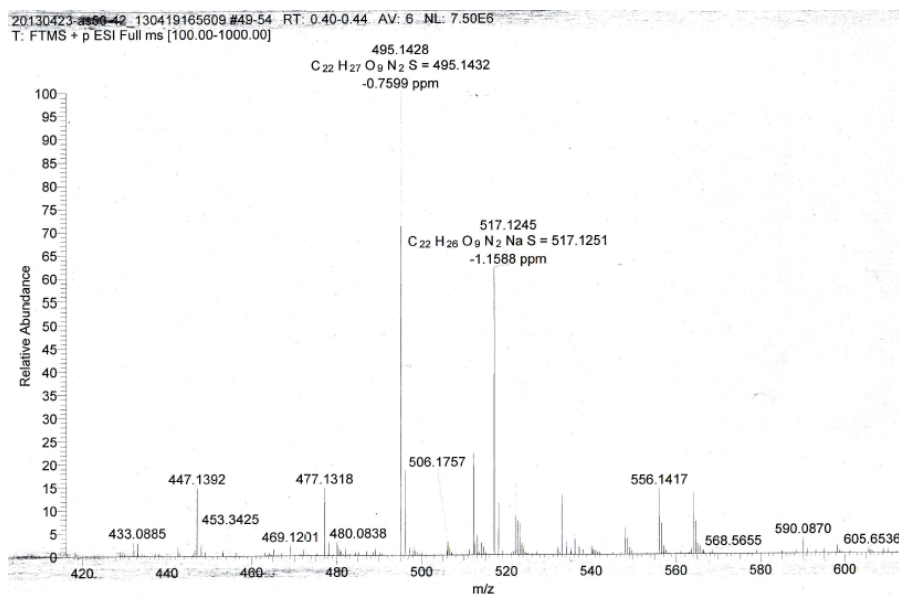

Figure S17. HR-ESI-MS spectrum of compound 2.

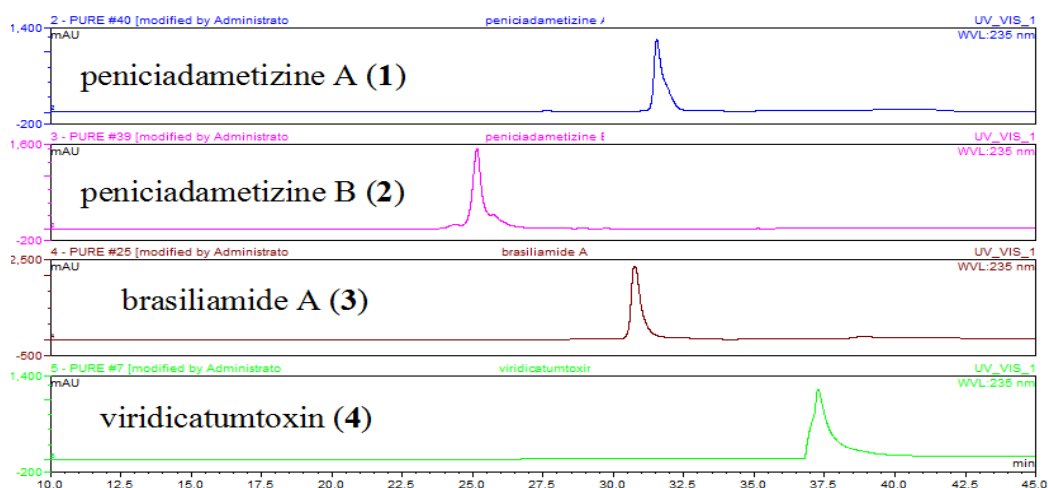

Figure S18. HPLC profiles of compounds 1–4 (Dionex Acclaim ODS column,  $4.6 \times 250$  mm,  $5 \mu\text{m}$ ; gradient (MeOH and H<sub>2</sub>O, 1 mL/min): 0~5 min, 10% MeOH, 5~35 min, 10% to 100% MeOH, 35~45 min, 100% MeOH, 45~50 min, 100% to 10% MeOH, 50~60 min, 10% MeOH).

Table S1. Brine shrimp lethality against *Artemia salina* of compounds 1 and 2.

| Concentration ( $\mu\text{g} \cdot \text{mL}^{-1}$ ) | 100  | 50   | 25   | 12.5 | 6.25 |
|------------------------------------------------------|------|------|------|------|------|
| 1                                                    | 45.5 | 29.6 | 28.7 | 24.9 | 21.1 |
| 2                                                    | 62.4 | 36.5 | 32.8 | 30.4 | 22.9 |
| colchicine                                           | 91.0 | 85.5 | 78.0 | 72.3 | 72.3 |
| GITC                                                 | 100  | 100  | 96.3 | 93.3 | 69.0 |

Positive controls: colchicine and 2,3,4,6-tetra-*O*-acetyl- $\beta$ -D-glucopyranosyl isothiocyanate (GITC).
